# Supplementary material for: Performance Improvement Based Authentication Protocol for Intervessel Traffic Service Data Exchange Format Protocol Based on U-Navigation System in WoT Environment
Source: Hindawi journal article supplement (doi:10.1155/2014/734768), 2014-01-01
Supplement: f1 [file 734768.f1.zip]

Archive with 6 entries (4 files):
- Photos/
- Photos/Photo.S1.jpg
- Photos/Photo.S2.jpg
- Videos/
- Videos/PC-Environment--s.wmv
- Videos/Wireless-Phone-Server--S.mp4
