# Supplementary figures and images for: Performance Improvement Based Authentication Protocol for Intervessel Traffic Service Data Exchange Format Protocol Based on U-Navigation System in WoT Environment
Source: Hindawi journal article supplement (doi:10.1155/2014/734768), 2014-01-01

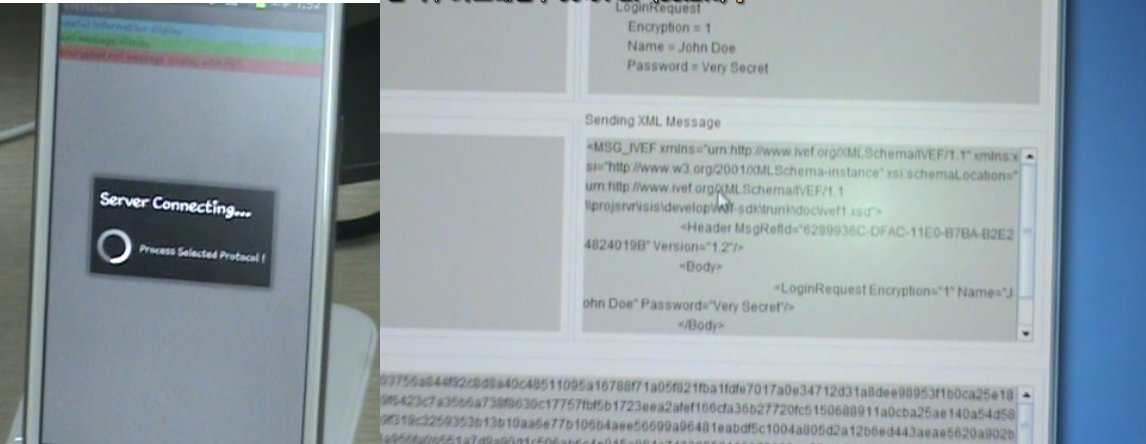

Supplement: f1 [file 734768.f1.zip › Photos/Photo.S1.jpg]

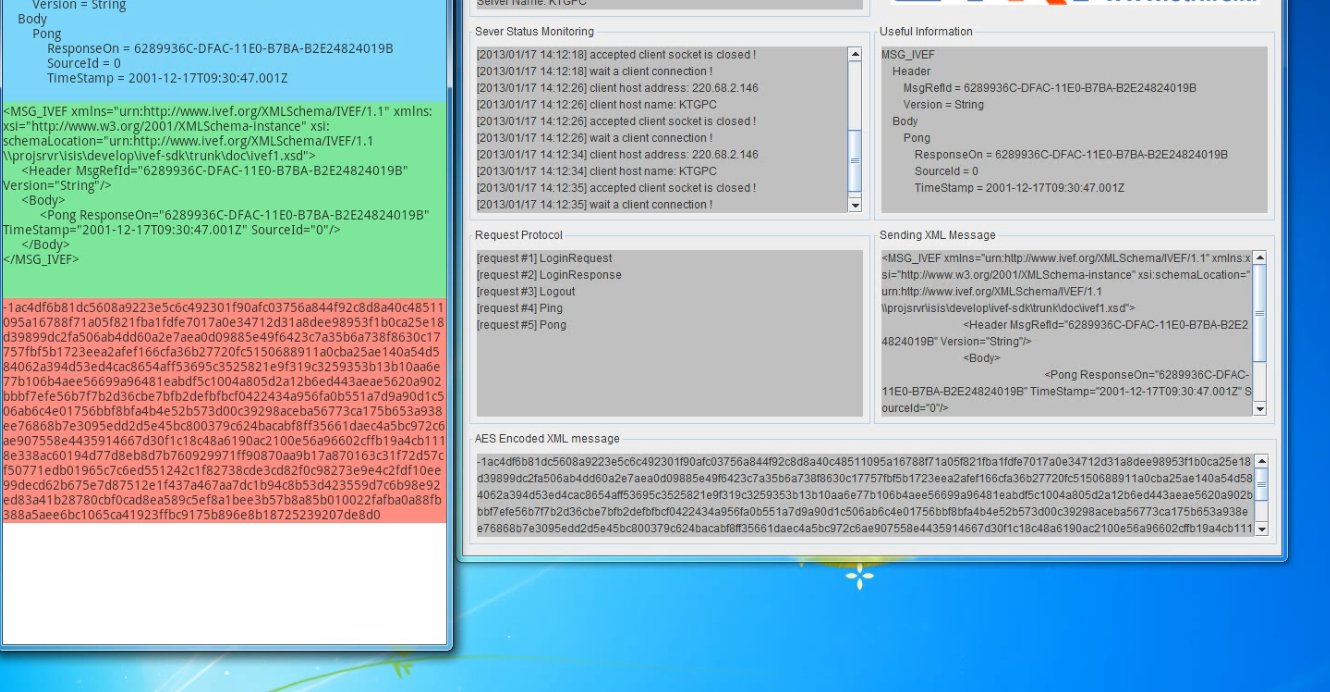

Supplement: f1 [file 734768.f1.zip › Photos/Photo.S2.jpg]
